1 The plastidial exporter Enhanced Disease  
2 Susceptibility 5 is required for the  
3 biosynthesis of *N*-hydroxy pipecolic acid  
4  
5

6 Short title: EDS5 is required for NHP biosynthesis  
7  
8

9 Dmitrij Rekhter<sup>1</sup>, Lennart Mohnike<sup>1</sup>, Kirstin Feussner<sup>1,2</sup>, Krzysztof Zienkiewicz<sup>1,2</sup>, Yuelin  
10 Zhang<sup>3</sup>, Ivo Feussner<sup>1,2,4,\*</sup>

11 <sup>1</sup> University of Goettingen, Albrecht-von-Haller-Institute for Plant Sciences, Department of  
12 Plant Biochemistry, D-37077 Goettingen, Germany.

13 <sup>2</sup> University of Goettingen, Goettingen Center for Molecular Biosciences (GZMB), Service  
14 Unit for Metabolomics and Lipidomics, D-37077 Goettingen, Germany.

15 <sup>3</sup> University of British Columbia, Department of Botany, Vancouver, BC V6T 1Z4, Canada.

16 <sup>4</sup> University of Goettingen, Goettingen Center for Molecular Biosciences (GZMB),  
17 Department of Plant Biochemistry, D-37077 Goettingen, Germany.

18  
19 \*Correspondence to Ivo Feussner: [ifeussn@uni-goettingen.de](mailto:ifeussn@uni-goettingen.de).  
20  
21  
22  
23  
24  
25

## 26 **Abstract**

27 Pipecolic acid is essential for the establishment of systemic acquired resistance in plants. It is  
28 synthesized in the plastid and further processed in the cytosol to its active form *N*-hydroxy pipecolic  
29 acid. Here we provide strong evidence that the exporter Enhanced Disease Susceptibility 5 is required  
30 for the biosynthesis of not only salicylic acid, but also *N*-hydroxy pipecolic acid, suggesting that it  
31 represents a convergent point of plant immunity.

32

## 33 **Introduction**

34 Plants face numerous biotic and abiotic challenges in nature. In order to cope with these threats, they  
35 produce a variety of metabolites. These small molecules are critical for the activation of their defense  
36 system<sup>1</sup>. The accumulation of salicylic acid (SA) and pipecolic acid (Pip) at the site of infection as well  
37 as in systemic tissues is a key event for the successful immune response against biotrophic pathogens<sup>2</sup>.  
38 The first step in SA biosynthesis, the conversion of chorismic acid (CA) to isochorismic acid (IC) by  
39 Isochorismate Synthase 1 (ICS1) in plastids<sup>3</sup>. We previously showed that Enhanced Disease  
40 Susceptibility 5 (EDS5) is essential for the export of IC from plastids into the cytosol. IC is further  
41 processed to isochorismate-9-glutamate by *avrPphB* Susceptible 3 (PBS3) that subsequently  
42 decomposes to SA in a non-enzymatical process<sup>4</sup>. Loss of any of these three genes leads to a drastic  
43 reduction of pathogen-induced SA production and to enhanced disease susceptibility<sup>5,6</sup>.

44 Pip has been shown to be equally crucial for plant immunity as SA<sup>7</sup>. Its biosynthesis occurs in plastids  
45 starting from lysine<sup>8,9</sup>. First, the  $\alpha$ -aminotransferase AGD2-like Defense Response Protein 1 (ALD1)  
46 catalyzes the formation of  $\epsilon$ -amino  $\alpha$ -keto caproic acid, which spontaneously cyclizes to  $\Delta^1$ -  
47 piperidine-2-carboxylic acid (P2C) in solution. The ketimine reductase SAR-Deficient 4 (SARD4)  
48 catalyzes subsequently the formation of Pip from P2C<sup>10</sup>. Pip-based signaling relies on Flavin-dependent  
49 Monooxygenase 1 (FMO1), which is responsible for the *N*-hydroxylation of Pip to yield *N*-hydroxy  
50 pipecolic acid (NHP)<sup>11,12</sup>. This newly discovered compound was proposed to be a crucial regulator of

51 systemic acquired resistance (SAR)<sup>11</sup>. Although the exact subcellular localization of FMO1 has not been  
52 determined yet, studies of other FMOs strongly suggest a localization on the cytoplasmic face of the  
53 endoplasmic reticulum<sup>13</sup>, implying the need for a transporter from the site of Pip biosynthesis to the  
54 location where it is further processed. Both SA and NHP can be further glycosylated to form SA- $\beta$ -  
55 glucoside (SAG), SA-glucoseester (SGE)<sup>14</sup> and NHP-glycoside (NHP-OGlc)<sup>12</sup>, respectively. Glycosylation  
56 has been proposed to inactivate plant hormone signaling and is typically facilitated by cytosolic UDP-  
57 dependent glycosyltransferases (UGTs)<sup>15</sup>.

58

## 59 **Results and discussion**

60 Not only pathogenic infection, but also abiotic stresses like ozone or UV-C treatment stimulate the  
61 biosynthesis of SA and SAG<sup>16</sup>, leading to similar changes in gene expression<sup>17</sup>. In order to have a fast  
62 and reproducible test system for Pip synthesis, we examined the possibility to induce Pip production  
63 by UV-C stress. Indeed, Pip accumulates over time in *Arabidopsis thaliana* leaves in a similar course of  
64 time (Fig. 1a), as it was described for *Pseudomonas syringae* infection before<sup>11</sup>. Beside Pip, we also  
65 observed increased amounts of NHP and NHP-OGlc (of which the MS/MS fragmentation patterns are  
66 depicted in Fig. S1)<sup>12</sup>. This indicates that Pip oxidation and glycosylation similarly occur after UV-C  
67 treatment. To exclude that the observed synthesis of Pip and NHP-OGlc is activated by UV-C-triggered  
68 SA accumulation, we examined Pip and NHP-OGlc contents in the SA-deficient mutants, *eds5*, *pbs3*  
69 (Fig. 1b-e) and Salicylic acid Induction Deficient 2 (*sid2*), harboring a mutation in the *ICS1* gene (Fig. S2a  
70 and b). As expected, the mutant lines, but not wild type plants, lack both SA and SAG 24 hours after  
71 being exposed to UV-C for 20 min (Fig. 1b and c). On the other hand Pip and NHP-OGlc accumulation  
72 was observed only in wild type, *pbs3* and *sid2*, but surprisingly not in *eds5* plants (Fig. 1d and e). Similar  
73 to pathogen-treated plants<sup>11</sup>, UV-C stress- induced Pip-biosynthesis and -processing do not depend on  
74 the presence of SA in UV-C treated plants. The absence of Pip and NHP-OGlc in *eds5* raised the question  
75 whether EDS5 is responsible for the export of not only the SA precursor IC, but also of Pip. Recently, it  
76 was shown that *fmo1* mutants are impaired in the hydroxylation of Pip to NHP. Instead, they

77 accumulate large amounts of Pip upon UV-C irradiation (Fig. S3), again in a similar extent as described  
78 for pathogen assays<sup>11</sup>. In line with FMO1 functioning downstream of Pip synthesis, these results  
79 corroborate that EDS5 acts upstream of FMO1 by exporting Pip to the cytosol.

80 The assumed block in Pip export did not result in an enrichment of Pip in *eds5* plants, despite the  
81 induction of Pip biosynthesis on the transcriptional level: Both *SARD4* and *EDS5* were strongly  
82 upregulated upon UV-C treatment in the SA deficient *sid2* mutant and wild type plants (Fig. S2c and  
83 d), supporting our metabolite profiling results. In analogy, we observed increased levels of IC in *pbs3*,  
84 but not in *eds5* mutant plants upon UV-C treatment (Fig. S4). It is likely that a diversion of the metabolic  
85 flux prevents a harmful accumulation of both Pip and IC in plastids<sup>18</sup>. Pip may either inhibit its own  
86 biosynthesis via a feedback loop or feed into the lysine degradation pathway towards the Krebs cycle<sup>19</sup>.

87 IC on the other hand might be channeled towards the synthesis of aromatic amino acids.

88 In order to exclude that the observed absence of NHP and NHP-OGlc in *eds5* mutants is due to their  
89 inability to accumulate SA, we tested whether external SA supply could induce Pip and NHP-OGlc  
90 production in *eds5* and *pbs3* plants. As reported, SA treatment triggers the biosynthesis of Pip and  
91 NHP-OGlc in wild type plants (Fig. 2a)<sup>7</sup>. SA biosynthesis is impaired in the *pbs3* mutant, but drenching  
92 the soil with SA still initiated Pip biosynthesis in these plants (Fig. 2a). However, as with UV-C  
93 treatment, external SA also did not lead to Pip accumulation in *eds5* mutants. This is consistent with  
94 EDS5 representing a plastidial exporter of Pip independent of SA. When Pip irrigation was used to  
95 trigger *in planta* Pip biosynthesis, we detected increased levels of the downstream product NHP-OGlc  
96 in wild type plants (Fig. 2b). In *eds5* and the Pip biosynthesis mutant *sard4*, the levels of NHP-OGlc are  
97 reduced by more than 60%. This suggests that in the mutants only the external Pip was metabolized  
98 further, whereas *de novo* Pip biosynthesis did not occur. The ability of *eds5* plants to convert  
99 exogenously applied Pip into NHP-OGlc supports FMO1 being active outside of plastids and not  
100 affected by the loss of function of *EDS5*.

101 Taken together, we show that UV-C treatment is sufficient to induce the production of Pip and its  
102 metabolites. This process does not require the presence of SA and can thus be used to study the SA-

103 independent branch of plant defense signaling. Moreover, we identified here a previously unknown  
104 connection between Pip and *EDS5*, a gene that, so far, was only recognized for its involvement in SA  
105 biosynthesis<sup>16</sup>. Most likely *EDS5* is also responsible for the export of Pip from plastids into the cytosol,  
106 where it is further processed by FMO1. This spatial separation of Pip biosynthesis and site of activation  
107 adds an additional layer of regulation. Our study implies that *EDS5* serves as the central hub in the  
108 biosynthesis of two major defense signaling molecules, SA and NHP (Fig. 2c). It is surprising that no  
109 pathogen effector has been found to target *EDS5* and thereby exploit this key point in plant immunity.  
110

111 **Figures**

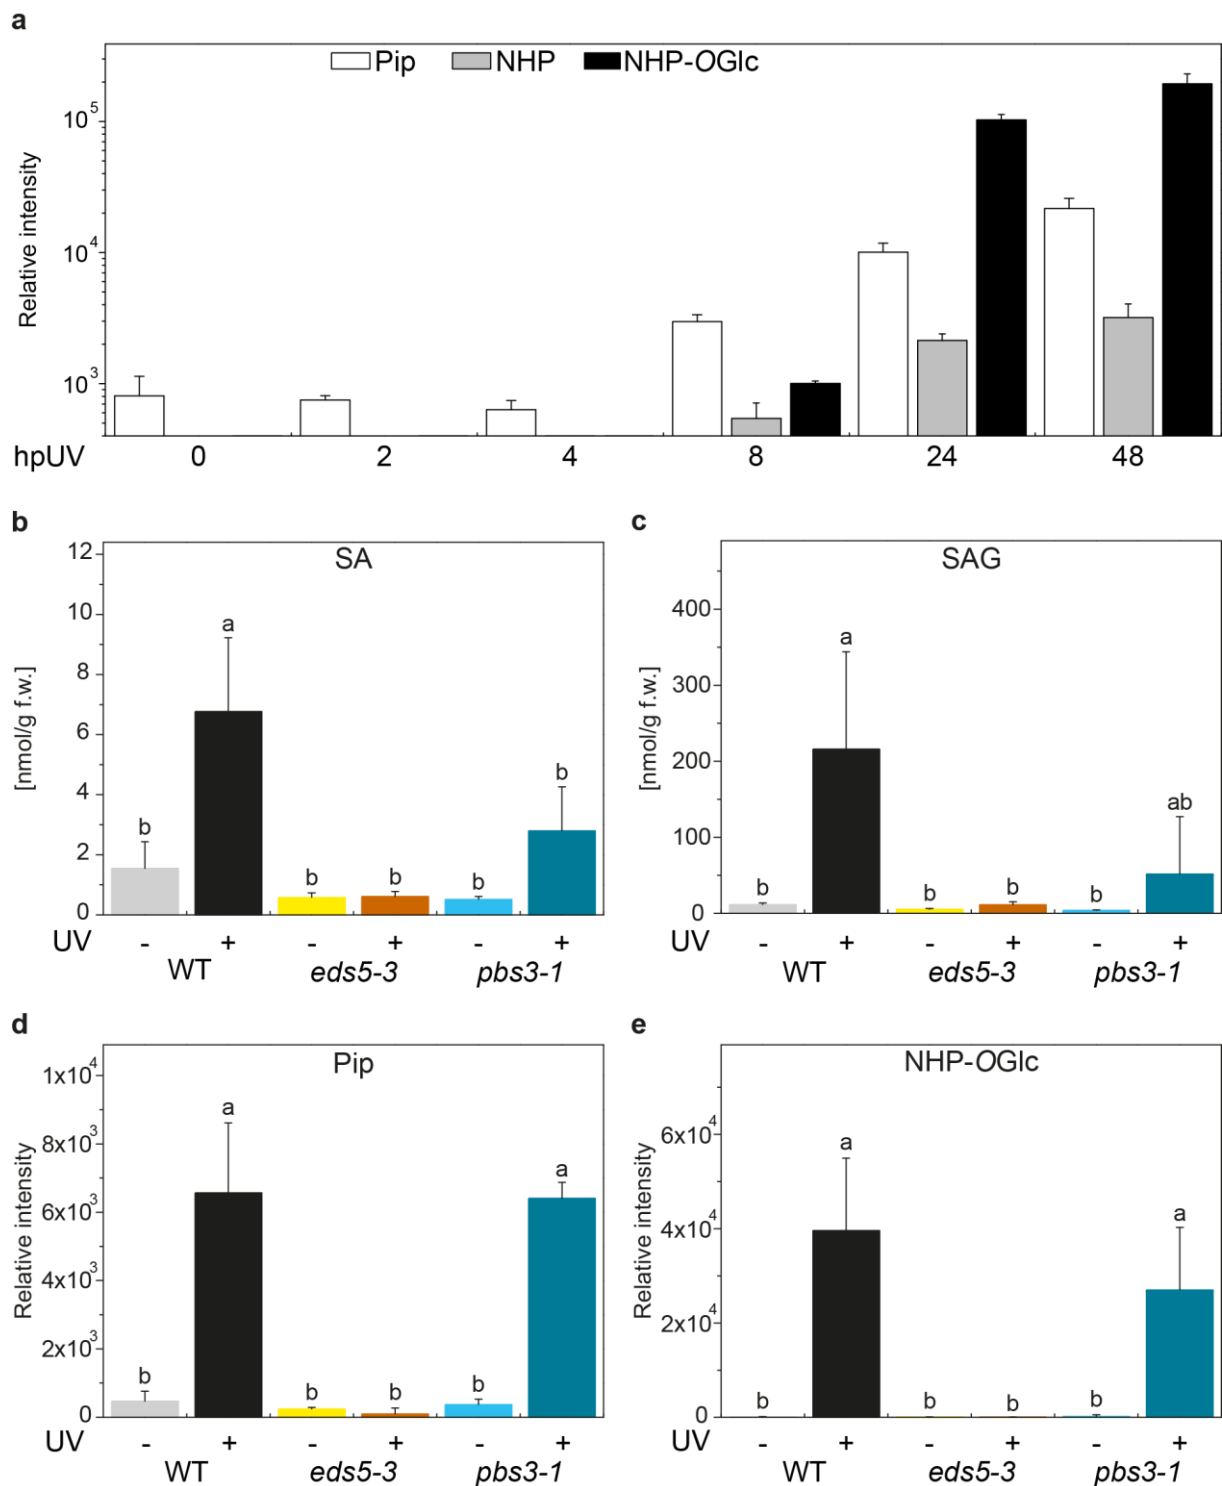

112

113 **Figure 1 UV-C treatment of *Arabidopsis thaliana* leads to an accumulation of the signaling**

114 **compounds SA and Pip and their corresponding glycosides. a, Levels in counts per second of Pip**

115 **(white bars) and its downstream products NHP (grey bars) and NHP-OGlc (black bars) in *Arabidopsis***

116 **wild type leaves (Col-0) at different time points after UV-C light treatment. b-e, Levels of SA and its**

117 glycoside SAG ( $\text{nmol g}^{-1}$  leaf fresh weight [f.w.]) and levels of Pip and its glycoside NHP-OGlc (counts  
118 per second) in leaves of wild type (Col-0), respectively *eds5-3* and *pbs3-1* mutant plants 24 hours after  
119 UV-C treatment in comparison to untreated plants. Bars represent the mean  $\pm$  STD of three biological  
120 replicates. Statistical differences among replicates are labeled with different letters ( $P < 0.05$ , one-way  
121 ANOVA and post hoc Tukey's Test;  $n = 3$ ). The experiments were repeated twice with similar results.  
122

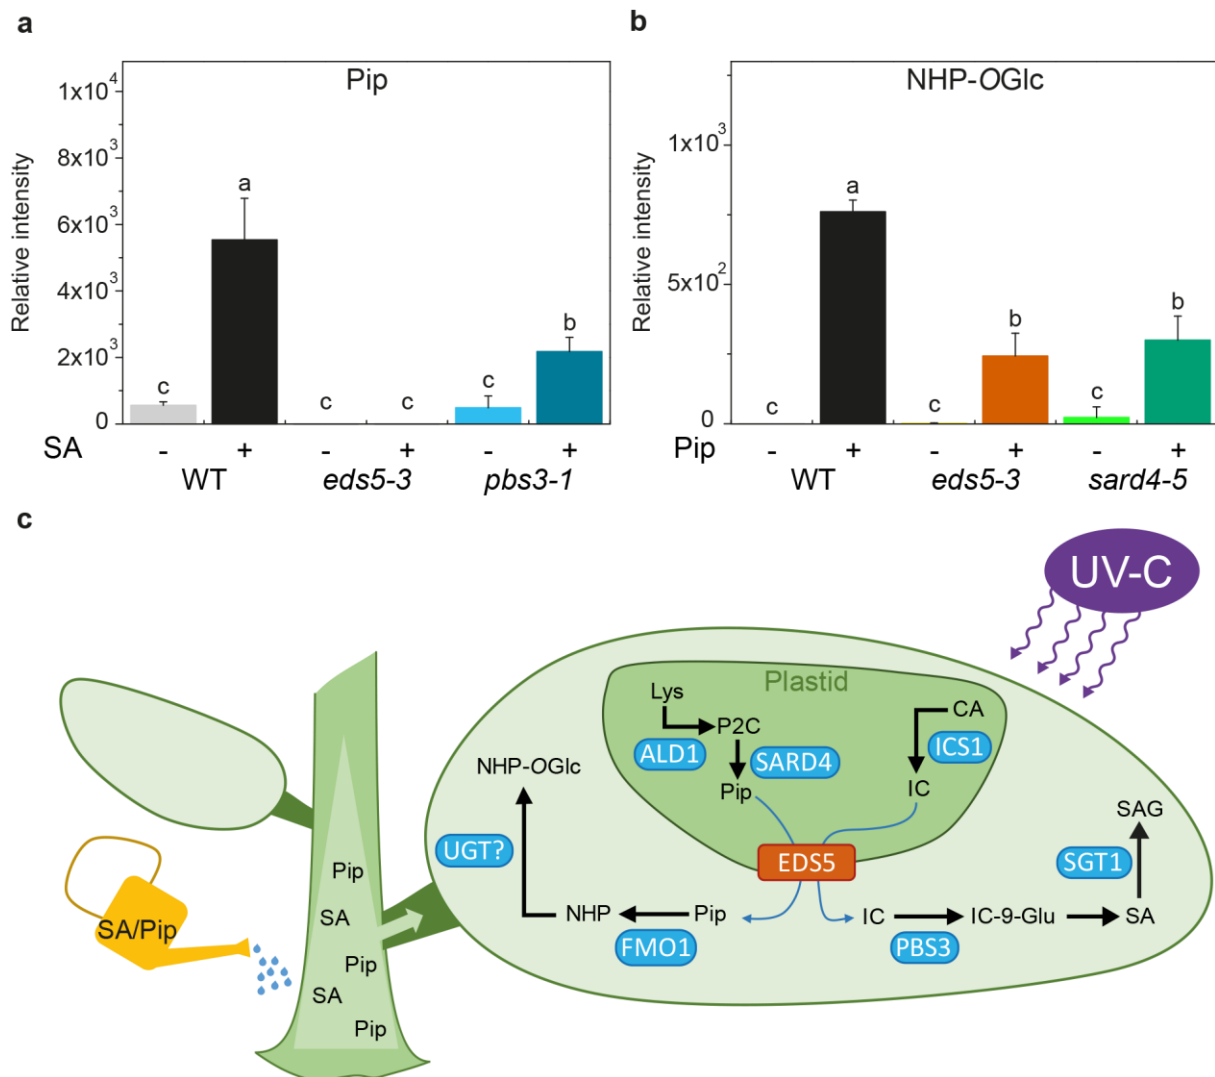

123

124

125 **Figure 2 Root application of either SA or Pip induces Pip biosynthesis and processing in leaves. a,**

126 Levels of Pip (counts per second [cps]) in leaves of wild type (Col-0) *eds5-3* and *pbs3-1* plants 24 hours

127 after soil drenching with water (-) or SA (+). **b,** Levels of NHP-OGlc (counts per second [cps]) in leaves

128 of wild type (Col-0), *eds5-3* and *sard4-5* plants 24 hours after soil drenching with water (-) or Pip (+).

129 Bars represent the mean  $\pm$  STD of three biological replicates. Statistical differences among replicates

130 are labeled with different letters ( $P < 0.05$ , one-way ANOVA and post hoc Tukey's Test;  $n = 3$ ). The

131 experiment was repeated twice with similar results. **c,** A working model depicting EDS5 as the central

132 hub in the biosynthesis of the signaling compounds SA and NHP. The induction of these pathways was

133 facilitated here by UV-C light treatment.

134



## 135 **Methods**

136 **Plant material.** *Arabidopsis* plants were grown in a chamber at 22 °C with a 16 h light period and 60%  
137 relative humidity for 4-5 weeks. For our experiments, we use *Arabidopsis* ecotype Col-0 and the  
138 following mutants in this background: *eds5-3*<sup>20</sup>, *pbs3-1*<sup>6</sup>, *sard4-5*<sup>10</sup>, and *fmo1-1*<sup>11</sup>, which were described  
139 previously.

140

141 **UV-C and soil drench treatment.** For the UV-C treatment, we followed previous protocol<sup>16</sup>. In short, 4-  
142 5 week old *Arabidopsis* plants were exposed to UV-C light (254 nm) for 20 min at 50 cm distance to the  
143 lamp (TUV T8 30W, Philips) for the induction of SA and Pip biosynthesis. For the treatment with SA and  
144 Pip, we followed previously described protocols<sup>7,20</sup>. 4-5 week old plants, were soil drenched with either  
145 10 mL water, 10 mL of a 5 mM Pip solution (P45850, Sigma) or 10 mL of a 5 mM SA solution (S5922,  
146 Sigma), equals to 50 µM final concentration. Samples were collected 24 hours after treatment and  
147 metabolites were extracted and analyzed as described earlier<sup>10,21</sup>. The deviation of exact mass to  
148 accurate mass for Pip, NHP and NHP-OGlc was less than ±2 mDa in the untargeted metabolite analysis.  
149 SA and SAG were quantified based on internal D4-SA standard (C/D/N Isotopes Inc., Pointe-Claire,  
150 Canada). The NHP standard was chemical synthesized as described in Hartmann et al., 2018<sup>11</sup>. The  
151 MS/MS spectra of NHP and NHP-OGlc corresponds to the results from Chen et al., 2018<sup>12</sup>.

152

153 **Quantitative real-time PCR analysis.** To analyze the expression of *SARD4* (At5g52810) and *EDS5*  
154 (AT4G39030) after UV-C treatment, total RNA was isolated from frozen leaves with the Spectrum™  
155 Plant Total RNA Kit (Sigma) following the manufacturer's instruction. One microgram of RNA was  
156 treated with DNase I (Thermo Fisher Scientific) and cDNA was synthesized using Revert Aid H Minus  
157 Reverse Transcriptase (Thermo Fisher Scientific). Quantitative RT-PCR was performed using Takyon No  
158 ROX SYBR Mastermix blue dTTP (Kaneka Eurogentec) in reaction volume 20 µl. The gene ACTIN8  
159 (At1g49240) was used as a control. Each reaction was performed with material from plants harvested

160 from three independent samples in iQ5 real time detection system (Bio-Rad). Primers are depicted in  
161 Supplementary Table 1.

162

## 163 **Acknowledgments**

164 We are grateful to Ulf Diedrichsen and Brigitte Worbs for the synthesis of the NHP authentic  
165 standard. This work was supported by the DFG (IRTG 2172 “PRoTECT” program of the Göttingen  
166 Graduate Center of Neurosciences, Biophysics, and Molecular Biosciences.) to D.R., L.M. and I.F.; I.F.  
167 was additionally supported by DFG excellence initiative (ZUK 45/2010 and INST 186/822-1). Y.Z. was  
168 supported by Natural Sciences and Engineering Research Council of Canada, Canada Foundation for  
169 Innovation, and British Columbia Knowledge Development Fund.

170

## 171 **Author contributions**

172 D.R., K.F. and I.F. conceived and designed the experiments. D.R., L.M., and K.Z. performed the  
173 experiments. D.R., K.F., Y.Z., and I.F. wrote the article. **Competing interests:** Authors declare no  
174 competing interests. **Data and materials availability:** All data is available in the main text or the  
175 supplementary materials. The authors responsible for distribution of materials integral to the findings  
176 presented in this article are: Ivo Feussner (ifeussn@uni-goettingen.de) and Yuelin Zhang  
177 (yuelin.zhang@ubc.ca).

178

- 179 1 Fu, Z. Q. & Dong, X. Systemic acquired resistance: Turning local infection into global defense.  
180 *Annu. Rev. Plant Biol.* **64**, 839-863, doi:10.1146/annurev-arplant-042811-105606 (2013).
- 181 2 Bernsdorff, F. *et al.* Pipecolic acid orchestrates plant systemic acquired resistance and defense  
182 priming via salicylic acid-dependent and -independent pathways. *Plant Cell* **28**, 102-129,  
183 doi:10.1105/tpc.15.00496 (2016).
- 184 3 Garcion, C. *et al.* Characterization and biological function of the ISOCHORISMATE SYNTHASE2  
185 gene of Arabidopsis. *Plant Physiol.* **147**, 1279-1287, doi:10.1104/pp.108.119420 (2008).
- 186 4 Rekhter, D. *et al.* PBS3 is the missing link in plant-specific isochorismate-derived salicylic acid  
187 biosynthesis. *bioRxiv*, 600692, doi:10.1101/600692 (2019).
- 188 5 Nawrath, C. & Métraux, J. P. Salicylic acid induction-deficient mutants of Arabidopsis express  
189 *PR-2* and *PR-5* and accumulate high levels of camalexin after pathogen inoculation. *Plant Cell*  
190 **11**, 1393-1404, doi:10.1105/tpc.11.8.1393 (1999).
- 191 6 Nobuta, K. *et al.* The GH3 acyl adenylase family member PBS3 regulates salicylic acid-  
192 dependent defense responses in Arabidopsis. *Plant Physiol.* **144**, 1144-1156,  
193 doi:10.1104/pp.107.097691 (2007).
- 194 7 Navarova, H., Bernsdorff, F., Döring, A.-C. & Zeier, J. Pipecolic acid, an endogenous mediator  
195 of defense amplification and priming, is a critical regulator of inducible plant immunity. *Plant*  
196 *Cell* **24**, 5123-5141, doi:10.1105/tpc.112.103564 (2012).
- 197 8 Song, J. T., Lu, H. & Greenberg, J. T. Divergent roles in *Arabidopsis thaliana* development and  
198 defense of two homologous genes, *ABERRANT GROWTH AND DEATH2* and *AGD2-LIKE*  
199 *DEFENSE RESPONSE PROTEIN1*, encoding novel aminotransferases. *Plant Cell* **16**, 353-366,  
200 doi:10.1105/tpc.019372 (2004).
- 201 9 Sharma, S., Shinde, S. & Verslues, P. E. Functional characterization of an ornithine  
202 cyclodeaminase-like protein of *Arabidopsis thaliana*. *BMC Plant Biol* **13**, 182,  
203 doi:10.1186/1471-2229-13-182 (2013).
- 204 10 Ding, P. *et al.* Characterization of a pipecolic acid biosynthesis pathway required for systemic  
205 acquired resistance. *Plant Cell* **28**, 2603-2615, doi:10.1105/tpc.16.00486 (2016).
- 206 11 Hartmann, M. *et al.* Flavin monooxygenase-generated *N*-hydroxypipecolic acid is a critical  
207 element of plant systemic immunity. *Cell* **173**, 456-469, doi:10.1016/j.cell.2018.02.049 (2018).
- 208 12 Chen, Y.-C. *et al.* *N*-hydroxy-pipecolic acid is a mobile metabolite that induces systemic disease  
209 resistance in *Arabidopsis*. *Proc. Natl. Acad. Sci. USA* **115**, E4920-E4929,  
210 doi:10.1073/pnas.1805291115 (2018).
- 211 13 Zhang, M. & Robertus, J. D. Molecular cloning and characterization of a full-length flavin-  
212 dependent monooxygenase from yeast. *Arch. Biochem. Biophys.* **403**, 277-283,  
213 doi:10.1016/S0003-9861(02)00237-0 (2002).
- 214 14 Song, J. T. Induction of a salicylic acid glucosyltransferase, AtSGT1, is an early disease response  
215 in *Arabidopsis thaliana*. *Molecules and Cells* **22**, 233-238 (2006).
- 216 15 Li, Y., Baldauf, S., Lim, E.-K. & Bowles, D. J. Phylogenetic analysis of the UDP-glycosyltransferase  
217 multigene family of *Arabidopsis thaliana*. *J. Biol. Chem.* **276**, 4338-4343,  
218 doi:10.1074/jbc.M007447200 (2001).
- 219 16 Serrano, M. *et al.* Export of salicylic acid from the chloroplast requires the multidrug and toxin  
220 extrusion-like transporter EDS5. *Plant Physiol.* **162**, 1815-1821, doi:10.1104/pp.113.218156  
221 (2013).
- 222 17 Kilian, J. *et al.* The AtGenExpress global stress expression data set: protocols, evaluation and  
223 model data analysis of UV-B light, drought and cold stress responses. *Plant J.* **50**, 347-363,  
224 doi:10.1111/j.1365-313X.2007.03052.x (2007).
- 225 18 Widhalm, J. R. *et al.* Identification of a plastidial phenylalanine exporter that influences flux  
226 distribution through the phenylalanine biosynthetic network. *Nat. Commun.* **6**, 8142,  
227 doi:10.1038/ncomms9142 (2015).
- 228 19 Kirma, M., Araújo, W. L., Fernie, A. R. & Galili, G. The multifaceted role of aspartate-family  
229 amino acids in plant metabolism. *J. Exp. Bot.* **63**, 4995-5001, doi:10.1093/jxb/ers119 (2012).

230 20 Nawrath, C. EDS5, an essential component of salicylic acid-dependent signaling for disease  
231 resistance in Arabidopsis, is a member of the MATE transporter family. *Plant Cell* **14**, 275-286,  
232 doi:10.1105/tpc.010376 (2002).  
233 21 Kusch, S. *et al.* Arabidopsis *mlo3* mutant plants exhibit spontaneous callose deposition and  
234 signs of early leaf senescence. *bioRxiv*, 558122, doi:10.1101/558122 (2019).  
235
